# Supplementary material for: Melatonin targets ferroptosis through bimodal alteration of redox environment and cellular pathways in NAFLD model
Source: PubMed Central journal article supplement (PMC10560965; doi:10.1042/bsr20230128), 2023-10-06
Supplement: BSR-2023-0128_supp.pdf [file BSR-2023-0128_supp.pdf]

**Supplementary Information:**

**Supplementary Figure 1 :** Establishment of In-vivo and in- vitro model and MLT treatment design.

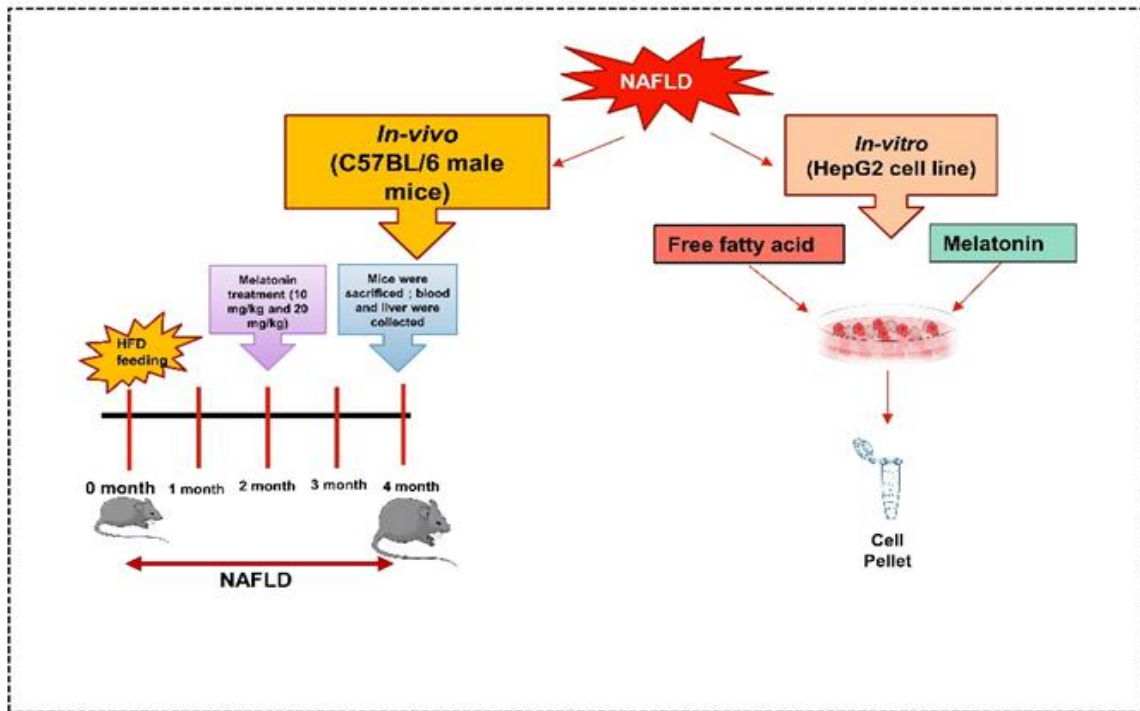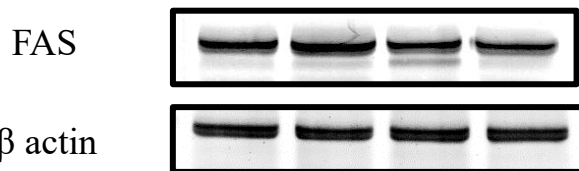

|               |   |   |   |   |
|---------------|---|---|---|---|
| FFA           | - | + | + | + |
| MLT D3        | - | - | + | - |
| FAS Inhibitor | - | - | - | + |

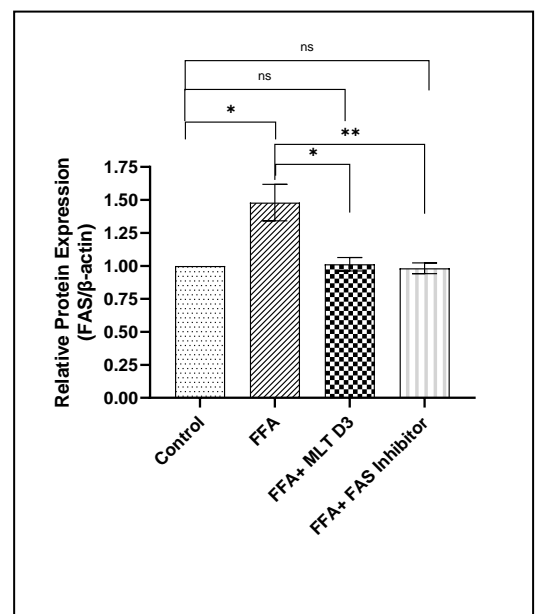

**Supplementary Figure 2:** Bar Diagram representing relative viability of HepG2 cells upon Melatonin treatment.

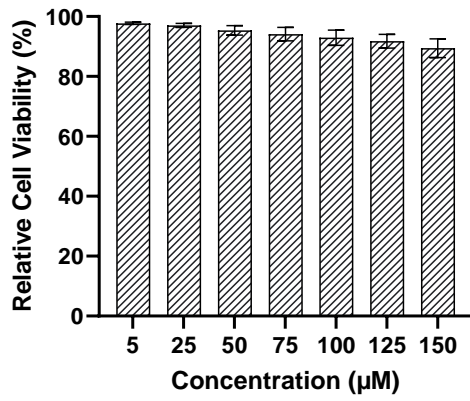

Full western Blot images of “Supplementary Figure 1”

**Raw Western Blot Images:**

**Figure 1**

**(D)**

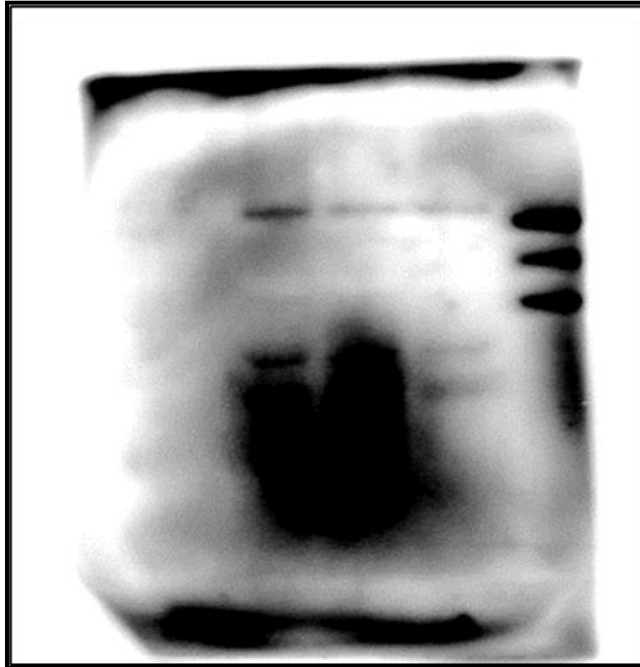

**SLC7A11**

**55kDa**

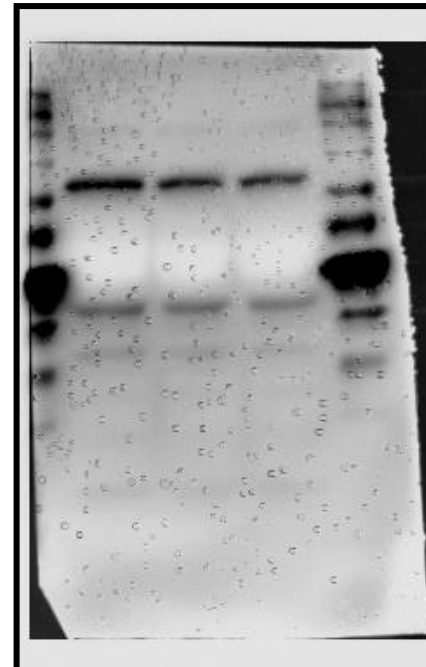

**GPX4**

**22kDa**

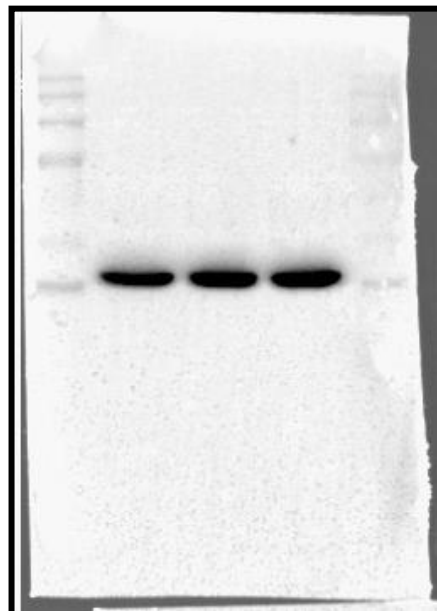

**$\beta$  actin**

**42kDa**

**Figure 2**

**(C)**

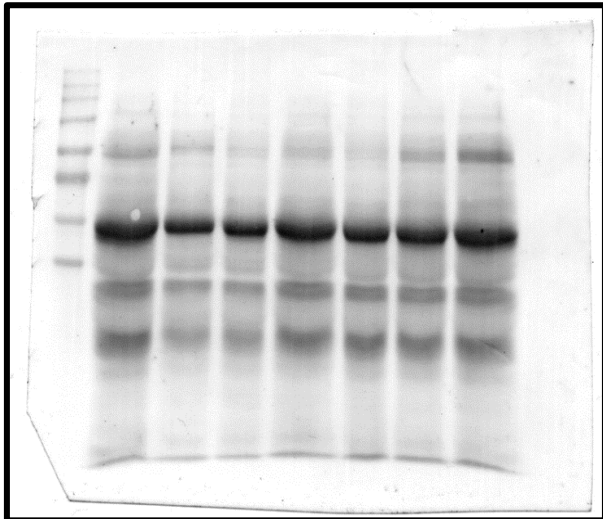

**SLC7A11**  
**55kDa**

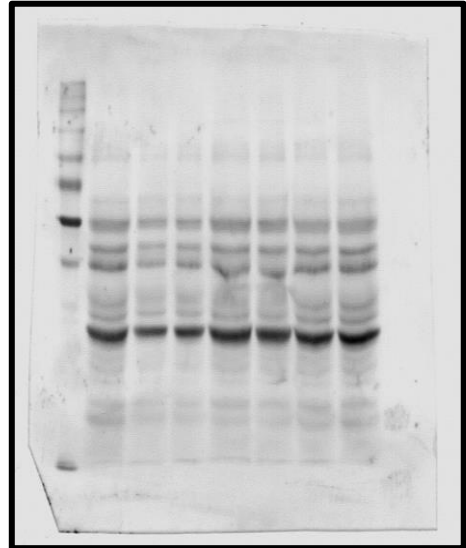

**GPX4**  
**22 kDa**

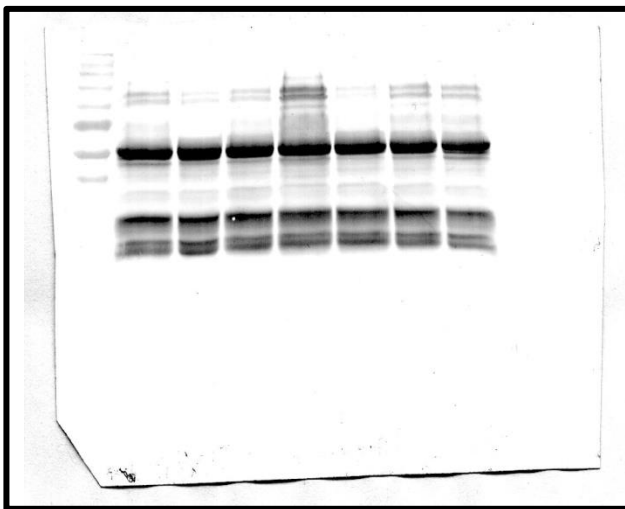

**$\beta$  actin**  
**42 kDa**

**Figure 3**

**(F)**

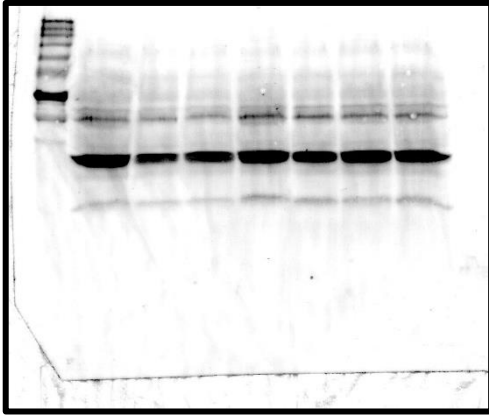

**HO - 1**  
**28 kDa**

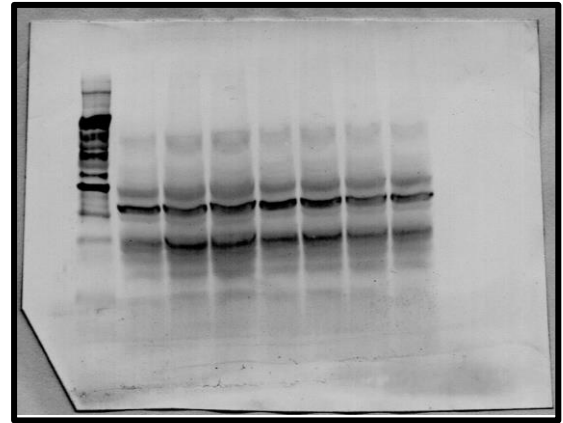

**Keap 1**  
**69 kDa**

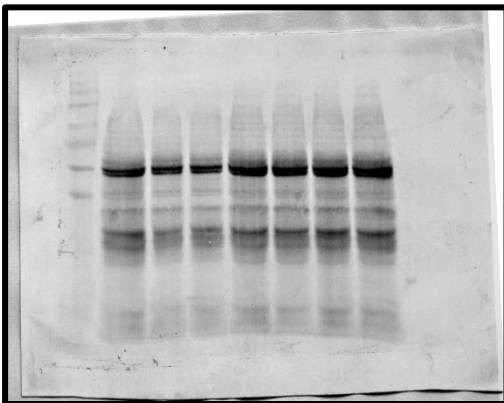

**Nrf2**  
**110 kDa**

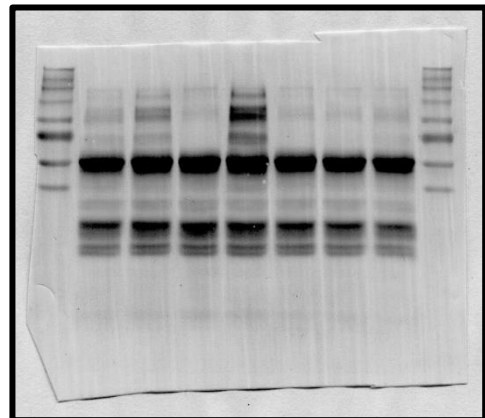

**$\beta$  actin**  
**42 kDa**

**Figure 4**

**(A)**

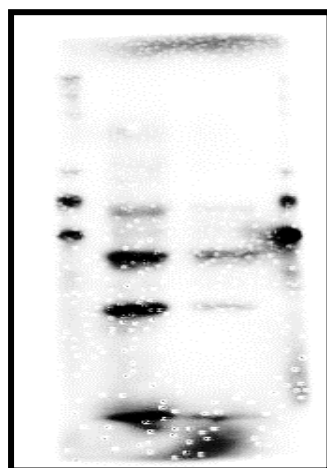

**Nrf2**  
**110 kDa**

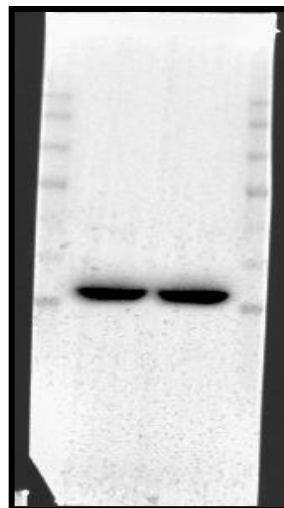

**β actin**  
**42 kDa**

**(C)**

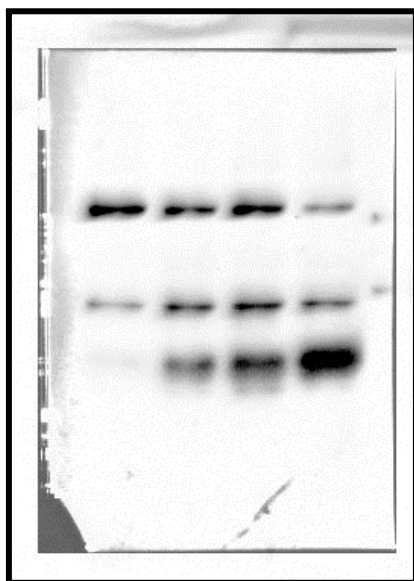

**SLC7A11**  
**55 kDa**

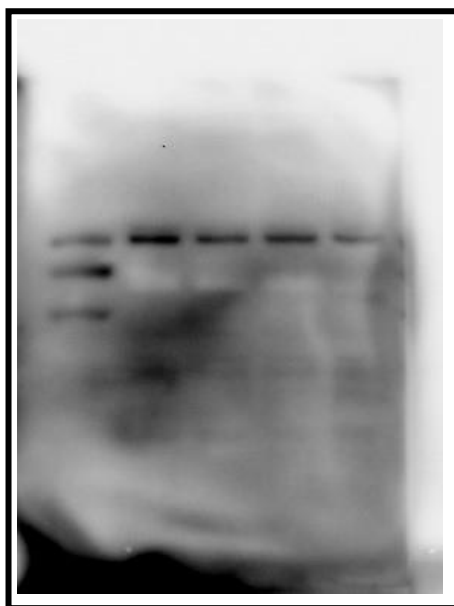

**GPX4**  
**22 kDa**

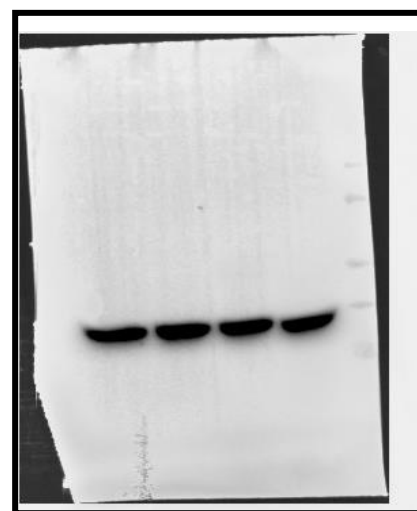

**42 kDa**

**Figure 6**

**(B)**

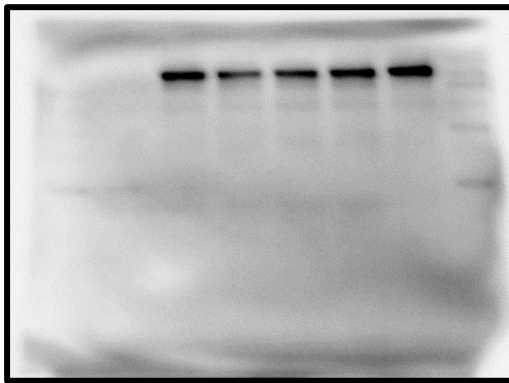

**p AMPK  $\alpha$**   
**62 kDa**

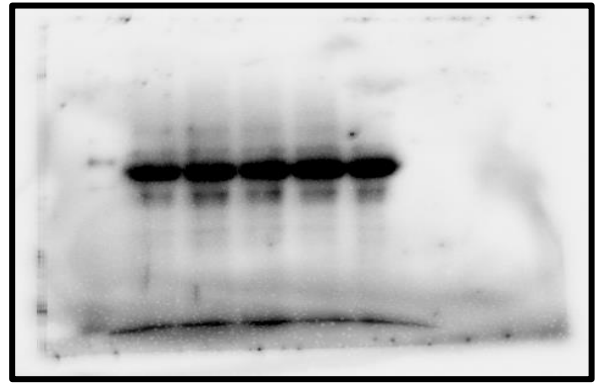

**AMPK  $\alpha$**   
**62 kDa**

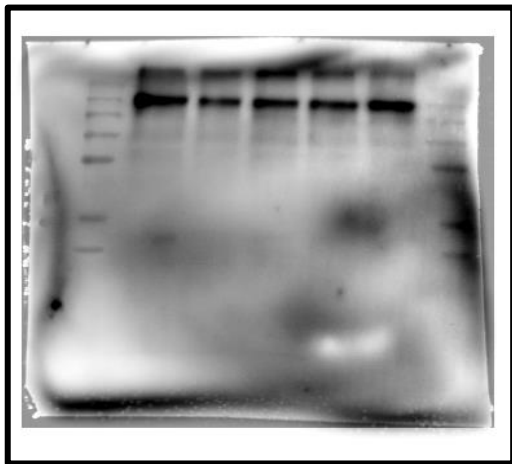

**PPAR  $\alpha$**   
**52 kDa**

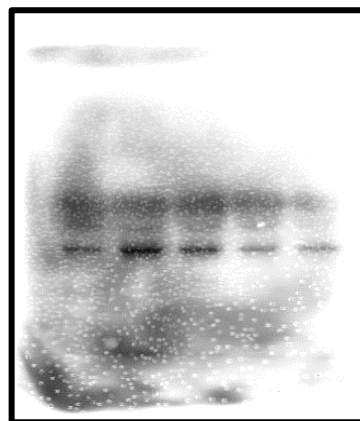

**PPAR  $\gamma$**   
**58 kDa**

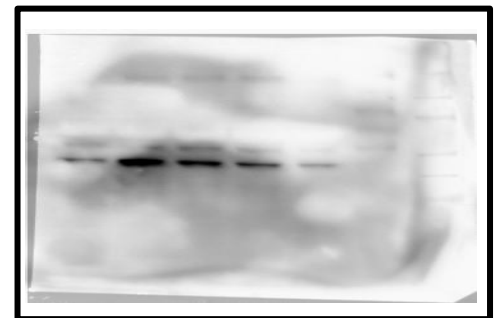

**SREBP1c**  
**150 kDa**

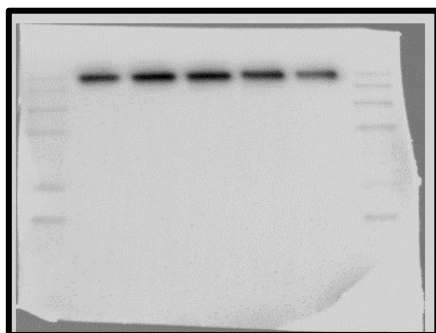

**FAS**

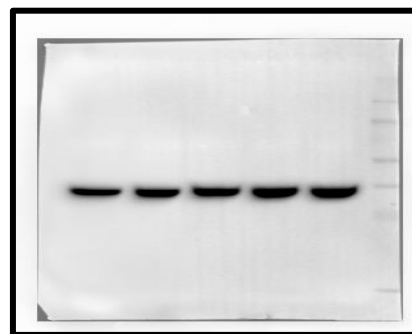

**$\beta$  actin**

228kDa

42 kDa

Figure : 8

(C)

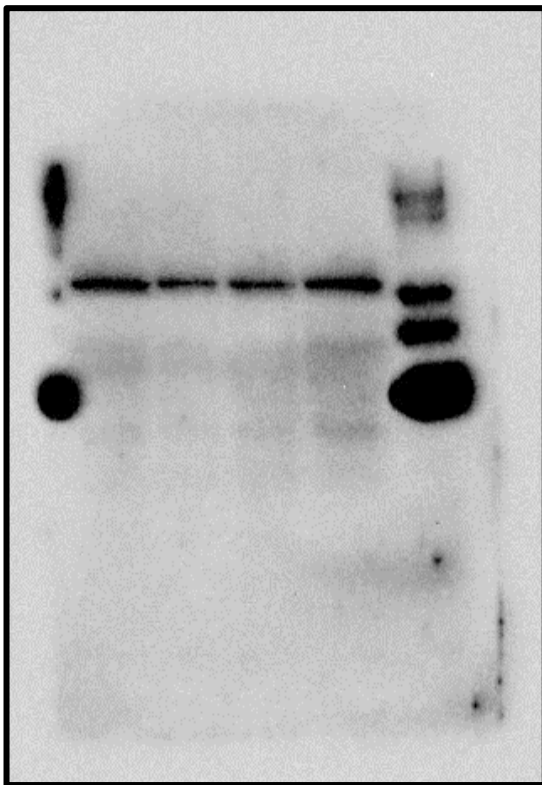

SLC7A11  
55 kDa

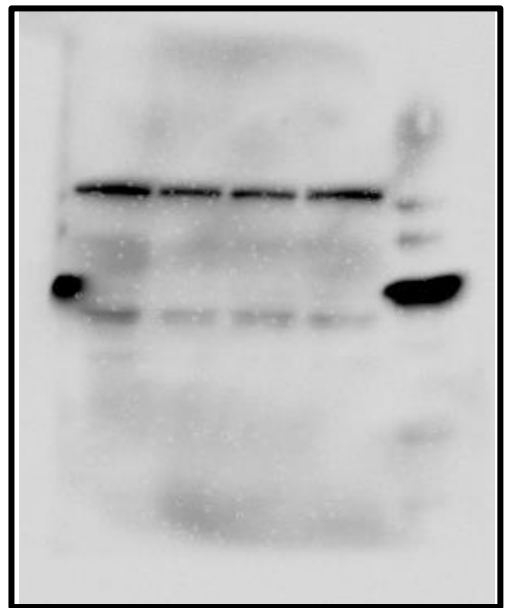

GPX4  
22 kDa

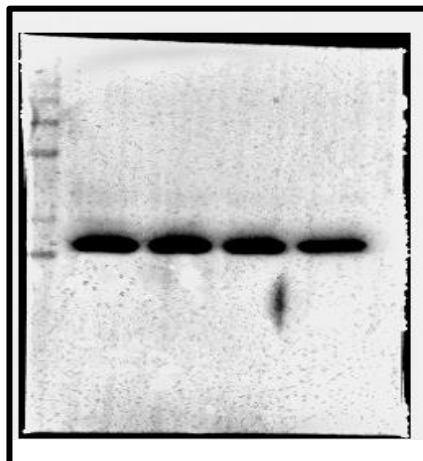



$\beta$  actin  
42 kDa

**Figure: 9**

(A)

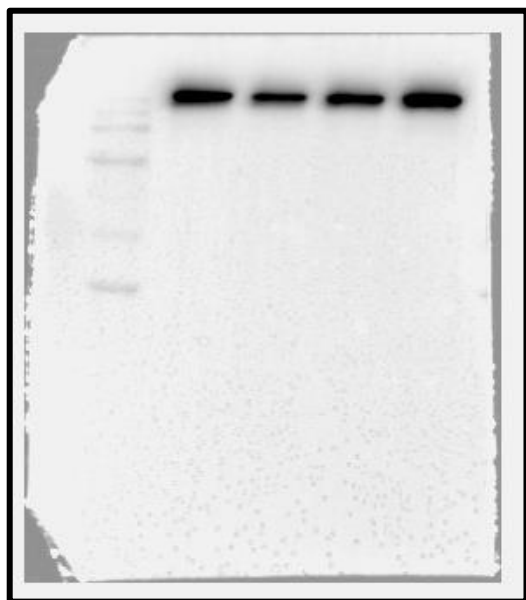

**Nrf 2**  
**110 kDa**

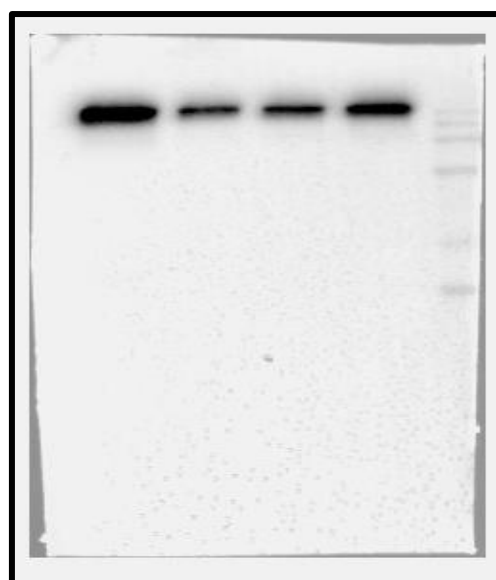

**HO 1**  
**28 kDa**

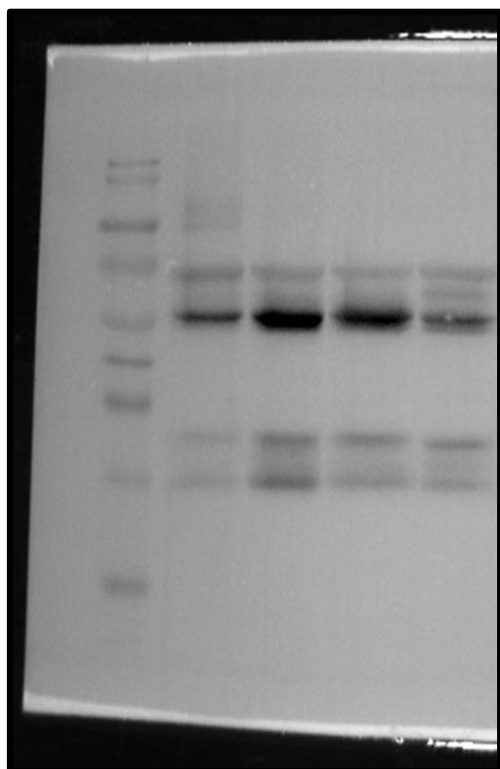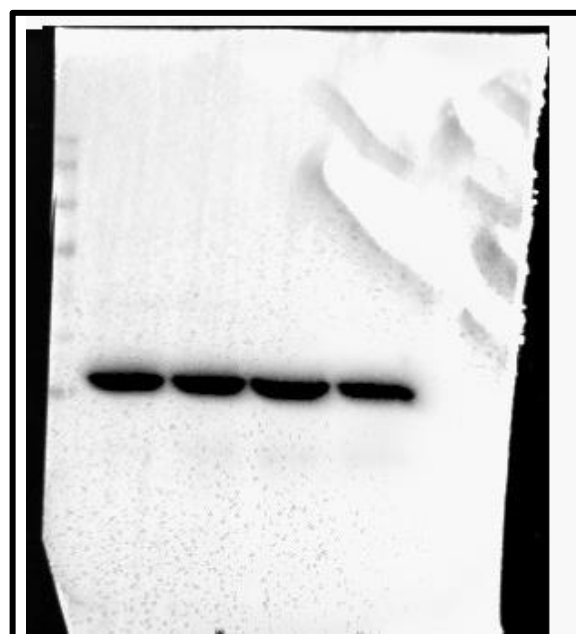

Figure : 10

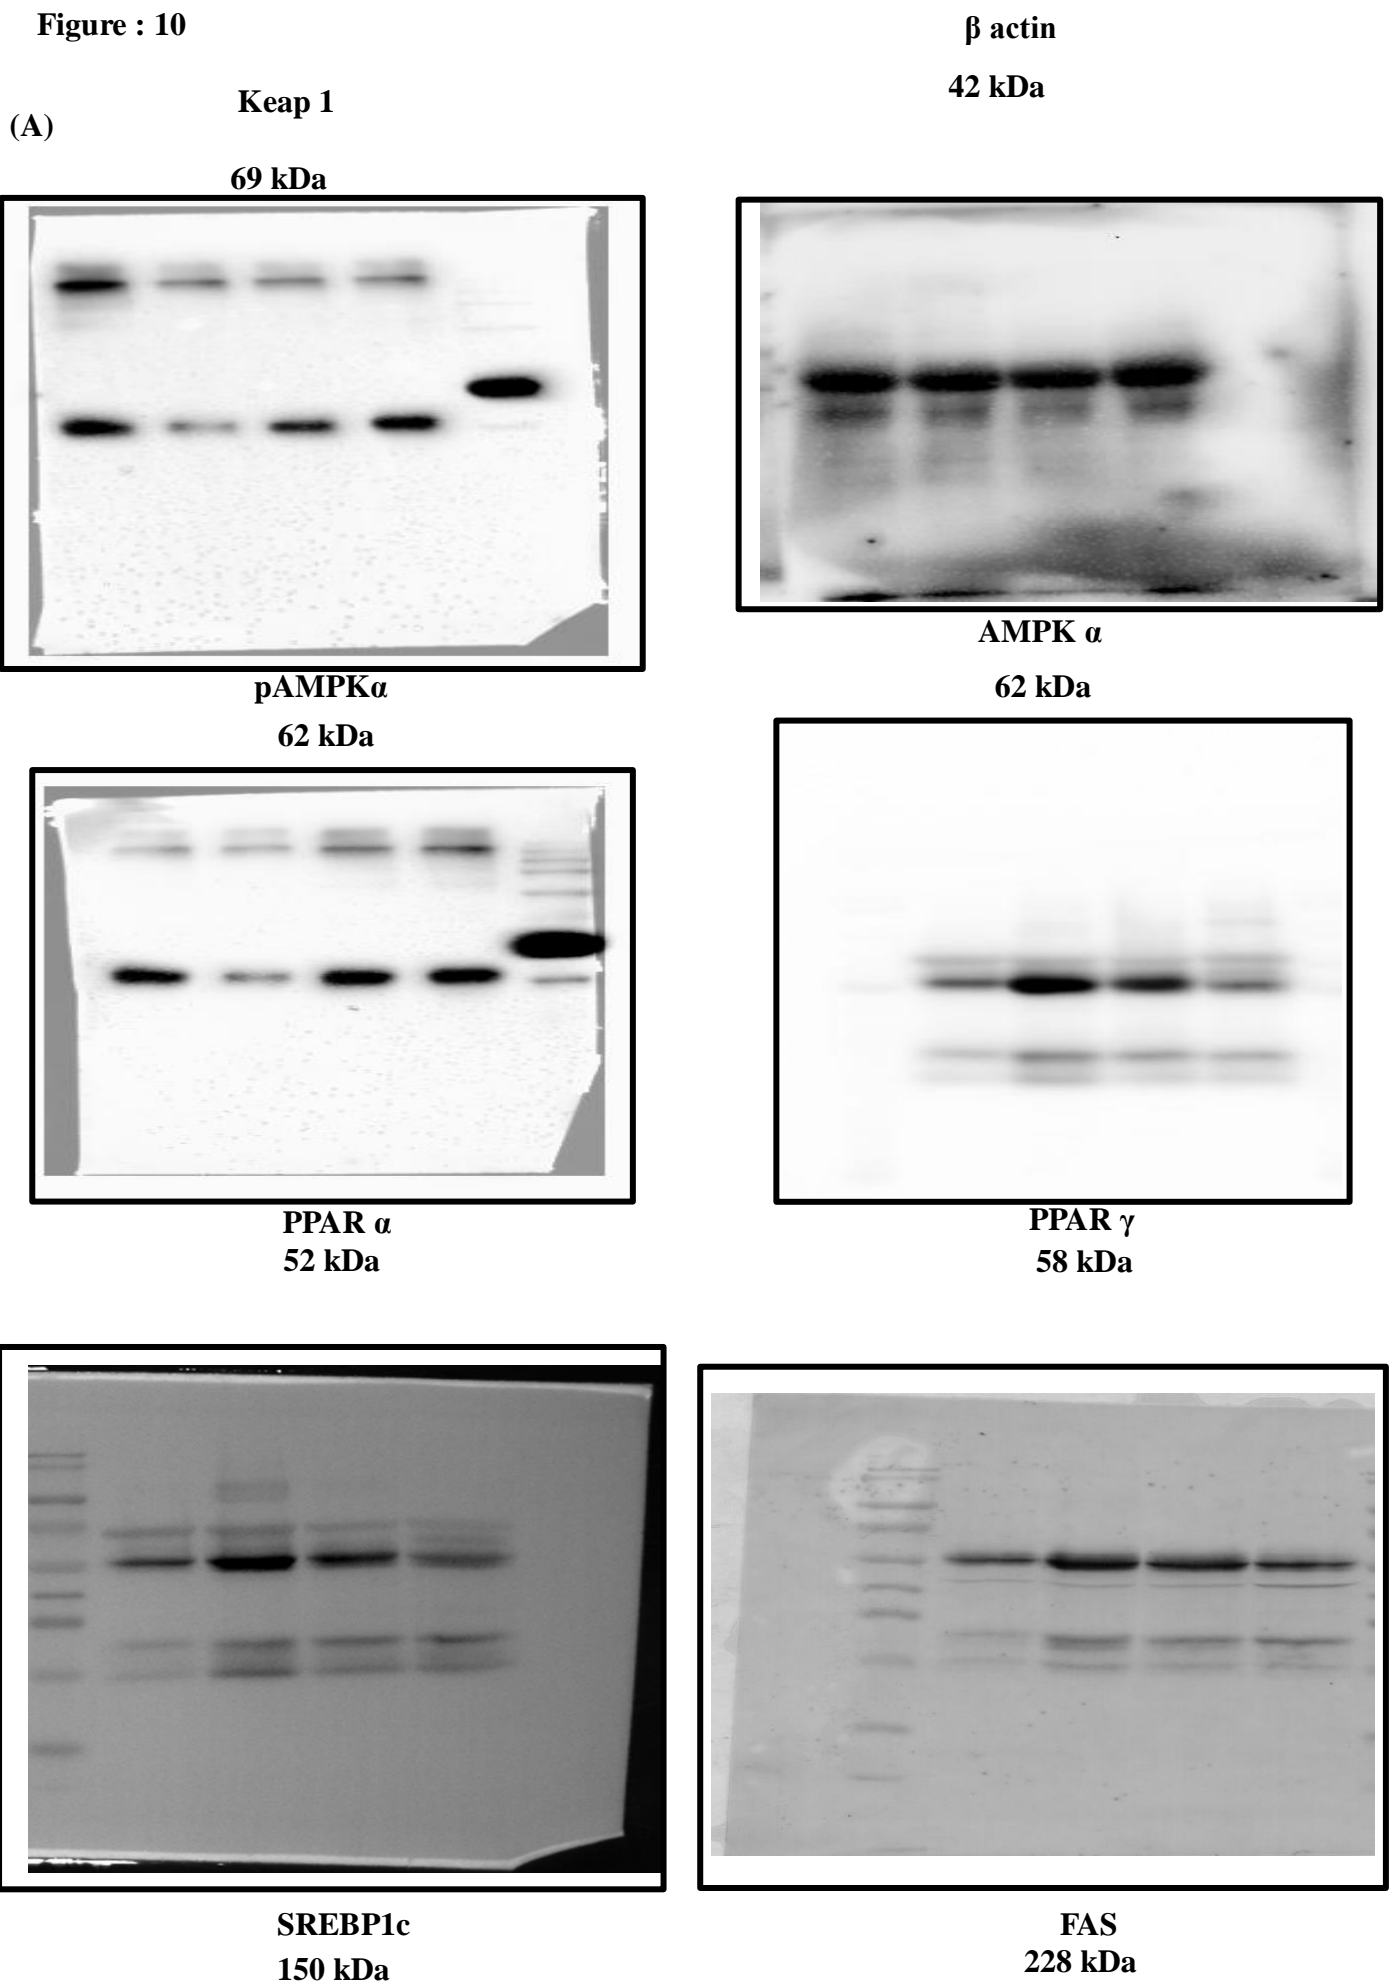

**Figure : 10**

**(A)**

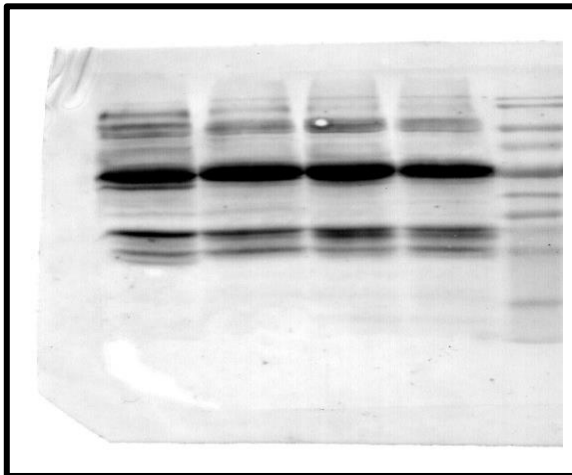

**$\beta$  actin**

**42 kDa**

**Supplementary Figure 1:**

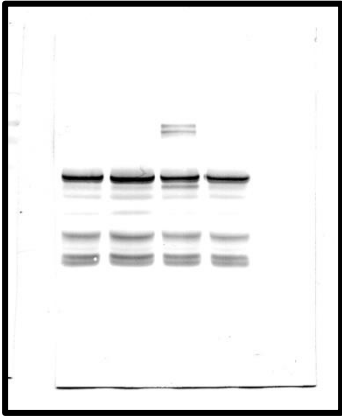

**FAS**

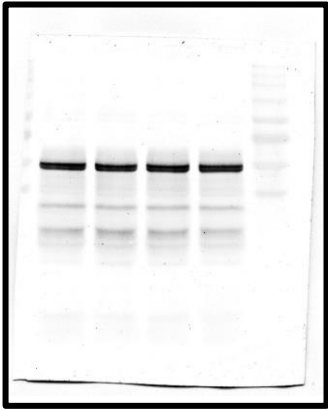

**β actin**
